# Supplementary material
Source: Springer Nature journal article supplement (https://www.springermedizin.de/resource/supplementary/13256_2013_2643_MOESM3_ESM.pdf/9650174)

PATIENT 3

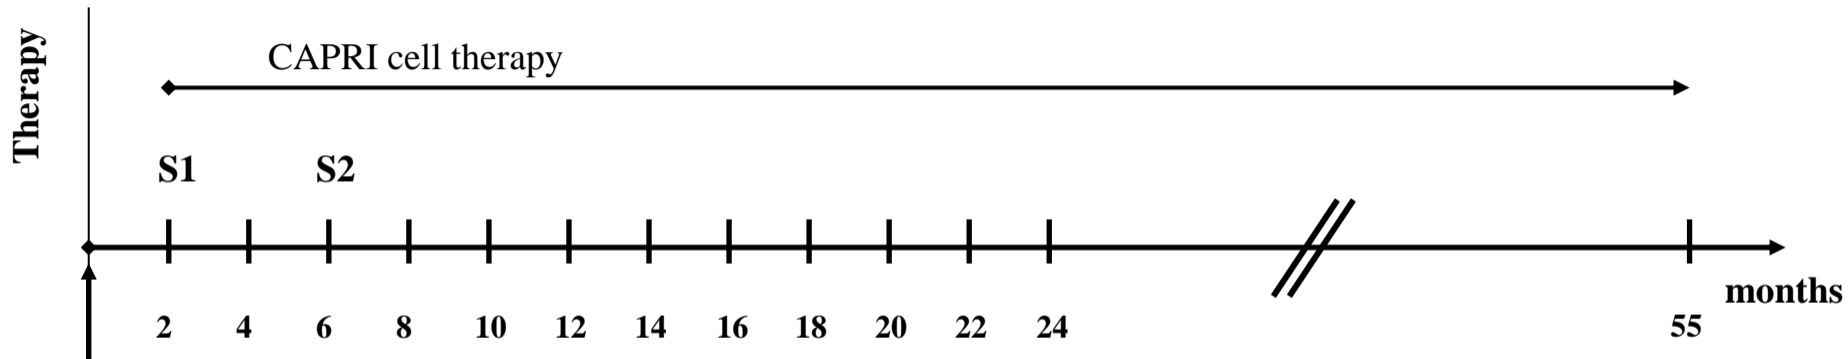

**D**

D = day of diagnosis

S1 = surgery 1: upper lobe

S2 = surgery 2: middle lobe

Supplement: MOESM3 [file 9650174]
